# Supplementary material for: Decoupling species richness variation and spatial turnover in beta diversity across a fragmented landscape
Source: PeerJ journal article supplement (doi:10.7717/peerj.6714), 2019-04-10
Supplement: AppendixS1_PeerJ.pdf [file AppendixS1_PeerJ.pdf]

SUPPLEMENTARY INFORMATION

**Decoupling species richness variation and spatial turnover in  
beta diversity across a fragmented landscape**

Guang Hu, Maxwell C. Wilson, Jianguo Wu, Jingjing Yu, Mingjian Yu

**APPENDIX S1: Classification and description of four plant functional types.**

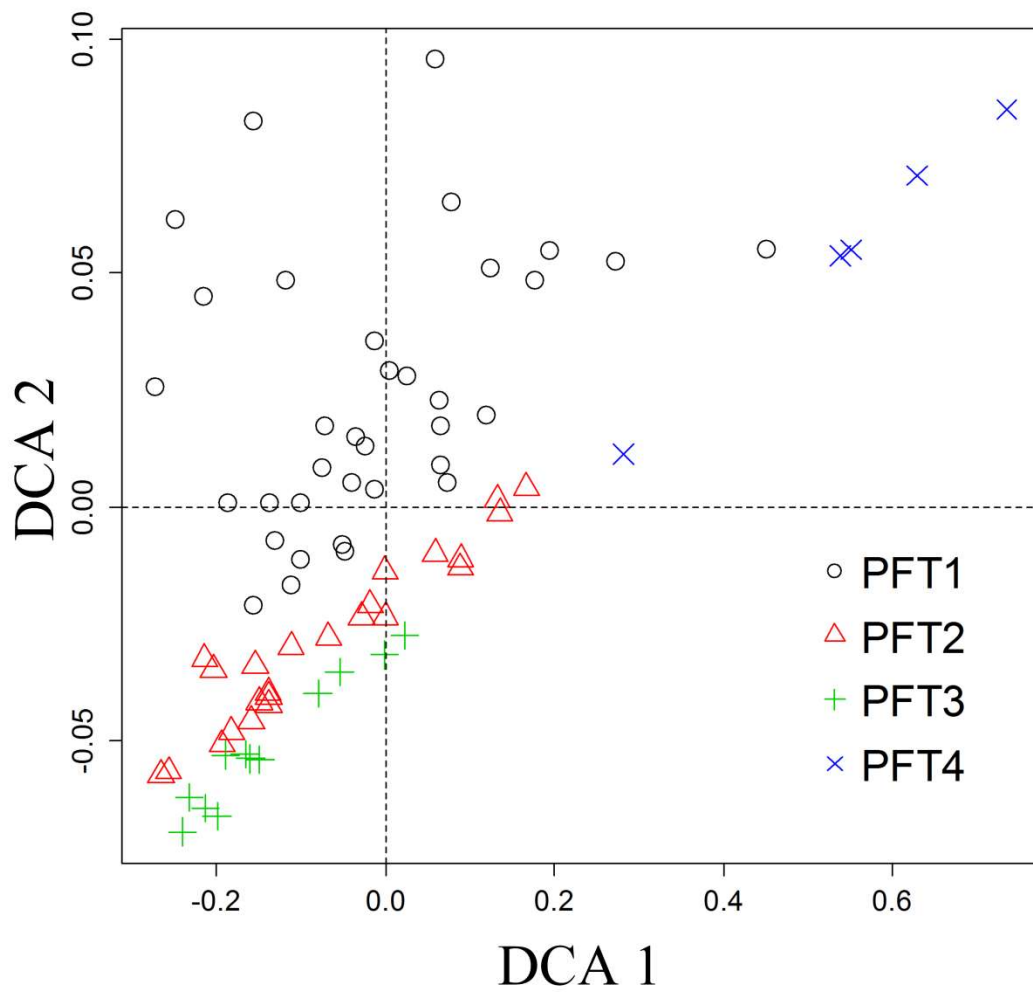

**Fig. S1** Detrended Correspondence Analysis (DCA) was used to test the classification of plant functional types.

**Table S1** Description of four plant functional types

| <b>PFTs</b> | <b>Richness</b> | <b>Description</b>                                               |
|-------------|-----------------|------------------------------------------------------------------|
| PFT1        | 36              | Evergreen, low SLA, shade tolerant, common species               |
| PFT2        | 24              | Deciduous, low SLA, shade tolerant or intolerant, common species |
| PFT3        | 11              | Deciduous, low SLA, shade intolerant, rare species               |
| PFT4        | 5               | Deciduous, high SLA, shade intolerant, rare species              |
